# Supplementary material for: It's Not the Flu: Popular Perceptions of the Impact of COVID-19 in the U.S
Source: PubMed Central journal article supplement (PMC8138202; doi:10.3389/fpsyg.2021.668518), 2021-05-07
Supplement: Data_Sheet_1.pdf [file Data_Sheet_1.pdf]

## Supplementary Materials

In Study 1, we examined used three versions of the vignettes to investigate whether judgments of the individual would be affected by how contagiousness was conveyed. Based on Niemi, Leone, and Young (2021), we varied whether the target specifically (a) spread the disease, or (b) was affected completely, for a very long time.

(a) The following sentences were added to the vignette provided in the main text:

[COVID-19] Someone he socialized with on his trip also contracted the coronavirus [flu].

[Flu] Someone he socialized with on his trip also contracted the seasonal flu.

[Car accident] Another driver also sustained injuries in the accident.

(b) [All conditions] Dan was still in the hospital, and completely unwell, several weeks later.

### Data and Materials

Data files, pre-registrations (AsPredicted.org), and study materials are uploaded to the corresponding author's OSF repository: [https://osf.io/5p7jk/?view\\_only=3fe0af9fa954a258a1a82bbf1476ad5](https://osf.io/5p7jk/?view_only=3fe0af9fa954a258a1a82bbf1476ad5)

### Full Statistics for the Regression Models (Model summaries in Table 1)

### Responsibility (Non-Covid)

| Model |                 | Unstandardized Coefficients |      | Standardized Coefficients |        | 95% C I for B |       |       |
|-------|-----------------|-----------------------------|------|---------------------------|--------|---------------|-------|-------|
|       |                 | B                           | SE   | Beta                      | t      | Sig.          | Lower | Upper |
| 1     | (Constant)      | 3.264                       | .212 |                           | 15.393 | .000          | 2.848 | 3.680 |
|       | BINDING         | .168                        | .034 | .106                      | 4.981  | .000          | .102  | .234  |
|       | INDIVIDUALIZING | -.069                       | .042 | -.035                     | -1.647 | .100          | -.152 | .013  |
| 2     | (Constant)      | 3.600                       | .266 |                           | 13.535 | .000          | 3.078 | 4.121 |
|       | BINDING         | .206                        | .043 | .129                      | 4.822  | .000          | .122  | .290  |
|       | INDIVIDUALIZING | -.087                       | .047 | -.044                     | -1.827 | .068          | -.180 | .006  |
|       | POLITICS        | -.034                       | .023 | -.042                     | -1.502 | .133          | -.079 | .011  |
|       | GENDER          | -.138                       | .059 | -.049                     | -2.311 | .021          | -.254 | -.021 |
|       | EDUCATION       | -.018                       | .029 | -.014                     | -.620  | .535          | -.076 | .040  |
|       | INCOME          | .002                        | .010 | .003                      | .147   | .883          | -.019 | .022  |

### Responsibility (Covid)

| Model |                 | Unstandardized Coefficients |      | Standardized Coefficients |        | 95% C I for B |       |       |
|-------|-----------------|-----------------------------|------|---------------------------|--------|---------------|-------|-------|
|       |                 | B                           | SE   | Beta                      | t      | Sig.          | Lower | Upper |
| 1     | (Constant)      | 3.223                       | .369 |                           | 8.724  | .000          | 2.498 | 3.948 |
|       | BINDING         | .095                        | .056 | .050                      | 1.694  | .091          | -.015 | .205  |
|       | INDIVIDUALIZING | .145                        | .071 | .060                      | 2.038  | .042          | .005  | .285  |
| 2     | (Constant)      | 4.051                       | .456 |                           | 8.891  | .000          | 3.157 | 4.945 |
|       | BINDING         | .236                        | .069 | .125                      | 3.396  | .001          | .100  | .372  |
|       | INDIVIDUALIZING | .045                        | .078 | .019                      | .579   | .563          | -.108 | .199  |
|       | POLITICS        | -.133                       | .039 | -.133                     | -3.447 | .001          | -.208 | -.057 |
|       | GENDER          | -.119                       | .104 | -.034                     | -1.142 | .254          | -.324 | .086  |
|       | EDUCATION       | -.032                       | .051 | -.019                     | -.632  | .528          | -.131 | .067  |
|       | INCOME          | -.024                       | .018 | -.043                     | -1.375 | .169          | -.058 | .010  |

### Contamination (Non-Covid)

| Model |                 | Unstandardized Coefficients |      | Standardized Coefficients |        | 95% C I for B |       |       |
|-------|-----------------|-----------------------------|------|---------------------------|--------|---------------|-------|-------|
|       |                 | B                           | SE   | Beta                      | t      | Sig.          | Lower | Upper |
| 1     | (Constant)      | 2.486                       | .283 |                           | 8.773  | .000          | 1.931 | 3.042 |
|       | BINDING         | .176                        | .045 | .082                      | 3.893  | .000          | .087  | .264  |
|       | INDIVIDUALIZING | .235                        | .056 | .088                      | 4.170  | .000          | .125  | .346  |
| 2     | (Constant)      | 2.446                       | .355 |                           | 6.891  | .000          | 1.750 | 3.142 |
|       | BINDING         | .273                        | .057 | .128                      | 4.782  | .000          | .161  | .384  |
|       | INDIVIDUALIZING | .141                        | .063 | .053                      | 2.229  | .026          | .017  | .265  |
|       | POLITICS        | -.082                       | .031 | -.075                     | -2.684 | .007          | -.142 | -.022 |
|       | GENDER          | .183                        | .079 | .049                      | 2.302  | .021          | .027  | .338  |
|       | EDUCATION       | .042                        | .039 | .024                      | 1.077  | .282          | -.035 | .120  |



|                  |       |      |       |       |      |       |      |
|------------------|-------|------|-------|-------|------|-------|------|
| <i>EDUCATION</i> | .143  | .050 | .087  | 2.847 | .004 | .045  | .242 |
| <i>INCOME</i>    | -.011 | .017 | -.019 | -.620 | .535 | -.045 | .023 |

### Risk (Non-Covid)

| <i>Model</i> | Unstandardized Coefficients |       | Standardized Coefficients |       | t      | Sig. | 95% C I for B |       |
|--------------|-----------------------------|-------|---------------------------|-------|--------|------|---------------|-------|
|              | B                           | SE    | Beta                      |       |        |      | Lower         | Upper |
| 1            | (Constant)                  | 3.074 | .250                      |       | 12.290 | .000 | 2.583         | 3.564 |
|              | <i>BINDING</i>              | .206  | .040                      | .110  | 5.179  | .000 | .128          | .284  |
|              | <i>INDIVIDUALIZING</i>      | .106  | .050                      | .045  | 2.135  | .033 | .009          | .204  |
| 2            | (Constant)                  | 3.008 | .313                      |       | 9.623  | .000 | 2.395         | 3.621 |
|              | <i>BINDING</i>              | .280  | .050                      | .149  | 5.575  | .000 | .181          | .378  |
|              | <i>INDIVIDUALIZING</i>      | .017  | .056                      | .007  | .308   | .758 | -.092         | .127  |
|              | <i>POLITICS</i>             | -.062 | .027                      | -.064 | -2.281 | .023 | -.114         | -.009 |
|              | <i>GENDER</i>               | .271  | .070                      | .082  | 3.876  | .000 | .134          | .408  |
|              | <i>EDUCATION</i>            | .023  | .035                      | .015  | .676   | .499 | -.045         | .091  |
|              | <i>INCOME</i>               | -.017 | .012                      | -.030 | -1.386 | .166 | -.041         | .007  |

### Risk (Covid)

| <i>Model</i> | Unstandardized Coefficients |       | Standardized Coefficients |       | t      | Sig. | 95% C I for B |       |
|--------------|-----------------------------|-------|---------------------------|-------|--------|------|---------------|-------|
|              | B                           | SE    | Beta                      |       |        |      | Lower         | Upper |
| 1            | (Constant)                  | 4.823 | .245                      |       | 19.691 | .000 | 4.343         | 5.304 |
|              | <i>BINDING</i>              | .103  | .037                      | .081  | 2.763  | .006 | .030          | .175  |
|              | <i>INDIVIDUALIZING</i>      | .188  | .047                      | .117  | 3.993  | .000 | .096          | .281  |
| 2            | (Constant)                  | 5.120 | .300                      |       | 17.060 | .000 | 4.531         | 5.709 |
|              | <i>BINDING</i>              | .176  | .046                      | .139  | 3.837  | .000 | .086          | .265  |
|              | <i>INDIVIDUALIZING</i>      | .098  | .052                      | .061  | 1.899  | .058 | -.003         | .199  |
|              | <i>POLITICS</i>             | -.060 | .025                      | -.089 | -2.347 | .019 | -.109         | -.010 |
|              | <i>GENDER</i>               | .271  | .069                      | .117  | 3.938  | .000 | .136          | .406  |
|              | <i>EDUCATION</i>            | -.084 | .033                      | -.077 | -2.528 | .012 | -.150         | -.019 |
|              | <i>INCOME</i>               | -.008 | .012                      | -.022 | -.733  | .464 | -.031         | .014  |

### Help (Non-Covid)

| <i>Model</i> | Unstandardized Coefficients |       | Standardized Coefficients |       | t      | Sig. | 95% C I for B |       |
|--------------|-----------------------------|-------|---------------------------|-------|--------|------|---------------|-------|
|              | B                           | SE    | Beta                      |       |        |      | Lower         | Upper |
| 1            | (Constant)                  | 3.414 | .235                      |       | 14.503 | .000 | 2.953         | 3.876 |
|              | <i>BINDING</i>              | .020  | .037                      | .011  | .527   | .598 | -.054         | .093  |
|              | <i>INDIVIDUALIZING</i>      | .339  | .047                      | .152  | 7.233  | .000 | .247          | .431  |
| 2            | (Constant)                  | 3.063 | .295                      |       | 10.370 | .000 | 2.484         | 3.642 |
|              | <i>BINDING</i>              | -.028 | .047                      | -.016 | -.587  | .557 | -.121         | .065  |
|              | <i>INDIVIDUALIZING</i>      | .384  | .053                      | .173  | 7.280  | .000 | .280          | .487  |
|              | <i>POLITICS</i>             | .041  | .025                      | .045  | 1.624  | .104 | -.009         | .091  |

|                  |      |      |      |       |      |       |      |
|------------------|------|------|------|-------|------|-------|------|
| <i>GENDER</i>    | .008 | .066 | .002 | .115  | .908 | -.122 | .137 |
| <i>EDUCATION</i> | .018 | .033 | .012 | .542  | .588 | -.046 | .082 |
| <i>INCOME</i>    | .020 | .012 | .037 | 1.707 | .088 | -.003 | .043 |

### Help (Covid)

| <i>Model</i> |                        | Unstandardized |      | Standardized |        | 95% C I for B |       |       |
|--------------|------------------------|----------------|------|--------------|--------|---------------|-------|-------|
|              |                        | Coefficients   |      | Coefficients |        | Sig.          | Lower | Upper |
|              |                        | B              | SE   | Beta         | t      |               |       |       |
| 1            | <i>(Constant)</i>      | 3.083          | .371 |              | 8.307  | .000          | 2.355 | 3.811 |
|              | <i>BINDING</i>         | -.091          | .056 | -.048        | -1.615 | .107          | -.201 | .020  |
|              | <i>INDIVIDUALIZING</i> | .279           | .071 | .115         | 3.898  | .000          | .138  | .419  |
| 2            | <i>(Constant)</i>      | 2.198          | .457 |              | 4.811  | .000          | 1.302 | 3.095 |
|              | <i>BINDING</i>         | -.133          | .070 | -.070        | -1.910 | .056          | -.270 | .004  |
|              | <i>INDIVIDUALIZING</i> | .329           | .078 | .136         | 4.188  | .000          | .175  | .483  |
|              | <i>POLITICS</i>        | .038           | .039 | .038         | .984   | .325          | -.038 | .114  |
|              | <i>GENDER</i>          | -.080          | .105 | -.023        | -.761  | .447          | -.285 | .126  |
|              | <i>EDUCATION</i>       | .200           | .051 | .120         | 3.934  | .000          | .100  | .300  |
|              | <i>INCOME</i>          | .007           | .018 | .012         | .382   | .703          | -.028 | .041  |

## REFERENCES

Niemi, L., Leone, C., and Young, L. (2021). Linguistic evidence for the dissociation between impurity and harm: differences in the duration and scope of contamination vs. injury. *Soc. Cogn.* 39:117. doi: 10.1521/soco.2021.39.1.117
